# Supplementary material for: Rescue of lysosomal acid lipase deficiency in mice by rAAV8 liver gene transfer
Source: Research Square preprint supplement (doi:10.21203/rs.3.rs-4354172/v1), 2024-07-18
Supplement: Supplementary file 1 [file 74808d748ca8dbedbd880453.docx]

# **Table of supplemental figures:**

**Fig. S1. [Description of the Lipa](#_Toc158038180)[-/-](#_Toc158038180) [mouse model. 2](#_Toc158038180)**

[**Fig. S2. Blood analysis of Lipa-/- mice treated with 4 different rAAV8 doses. 4**](#_Toc158038181)

[**Fig. S3. Quantification of cholesterol and triglycerides per mg of liver, spleen, and jejunum 12-weeks post-injection. 5**](#_Toc158038182)

[**Fig. S4. Long-term blood analysis of rAAV8.hAAT.LIPA treated Lipa-/- mice. 7**](#_Toc158038183)

**Fig. S5. [Quantification of cholesterol and triglycerides per mg of liver, spleen, and jejunum. 9](#_Toc158038184)**

**Fig. S6. [Quantification of lipid deposits in thymus 11](#_Toc158038185)**

**Fig. S7. [Read count of murine (m) and human (h) LIPA mRNA at 34-week post-injection. 13](#_Toc158038186)**

**
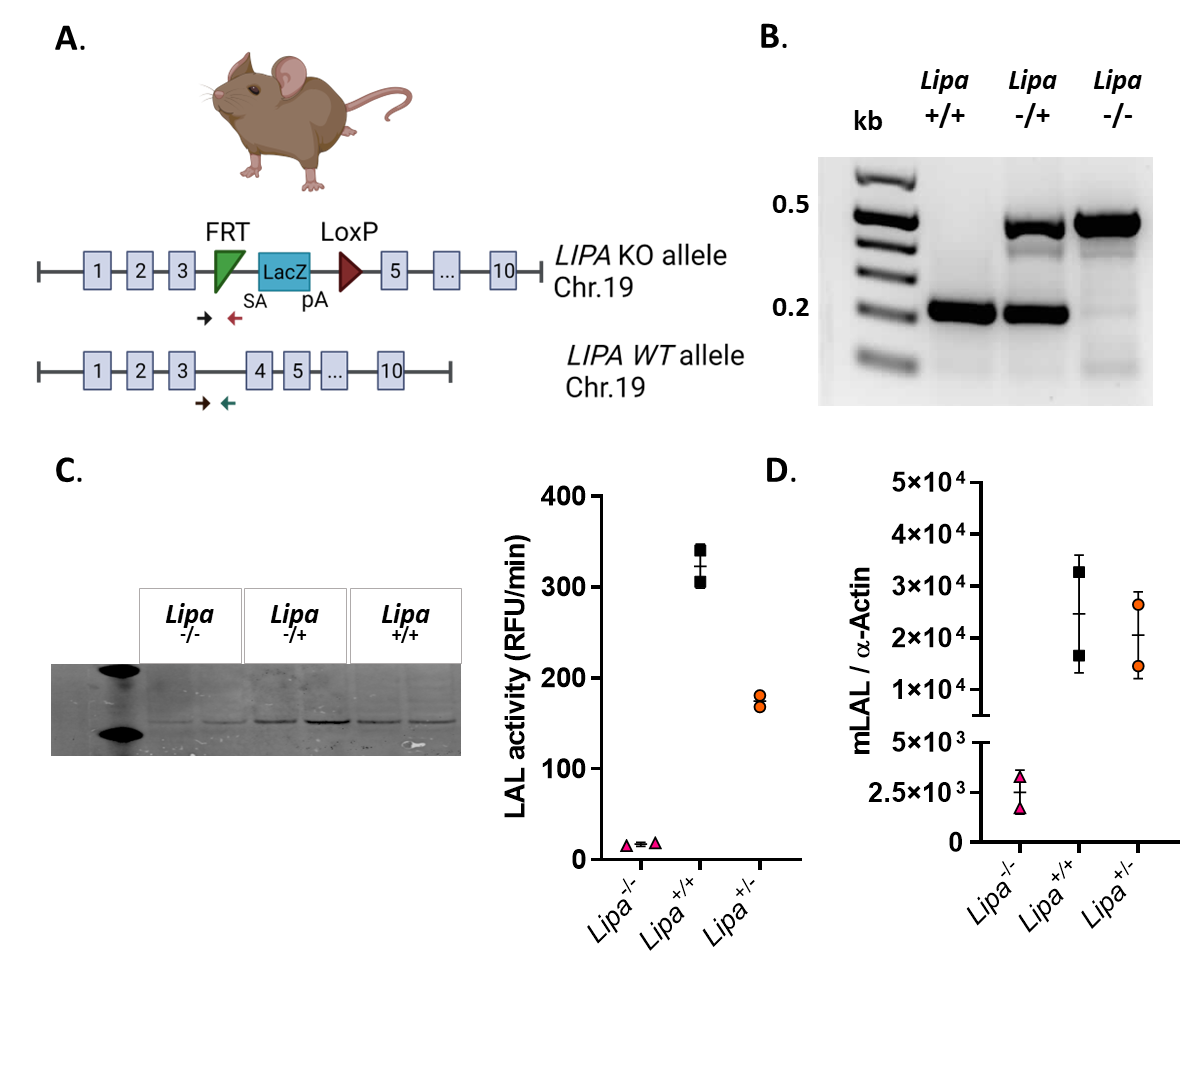
****Fig. S1. Description of the *Lipa-/-* mouse model**. (A)Lipa gene in KO and WT alleles. Arrows represent genotyping primers (black: common LAL F, red: LAL-KO R and blue: LAL-WT R; Table 1). **(B)** Agarose gel of the genotyping PCR. Kb represents the 1kb DNA ladder. **(C)** Western blot of mouse liver with mLAL antibody and its quantification relative to α*-*actin expression. **(D)** Relative fluorescence units (RFU) of LAL enzymatic activity in mouse liver. Bars indicate mean ± SD (n=2).


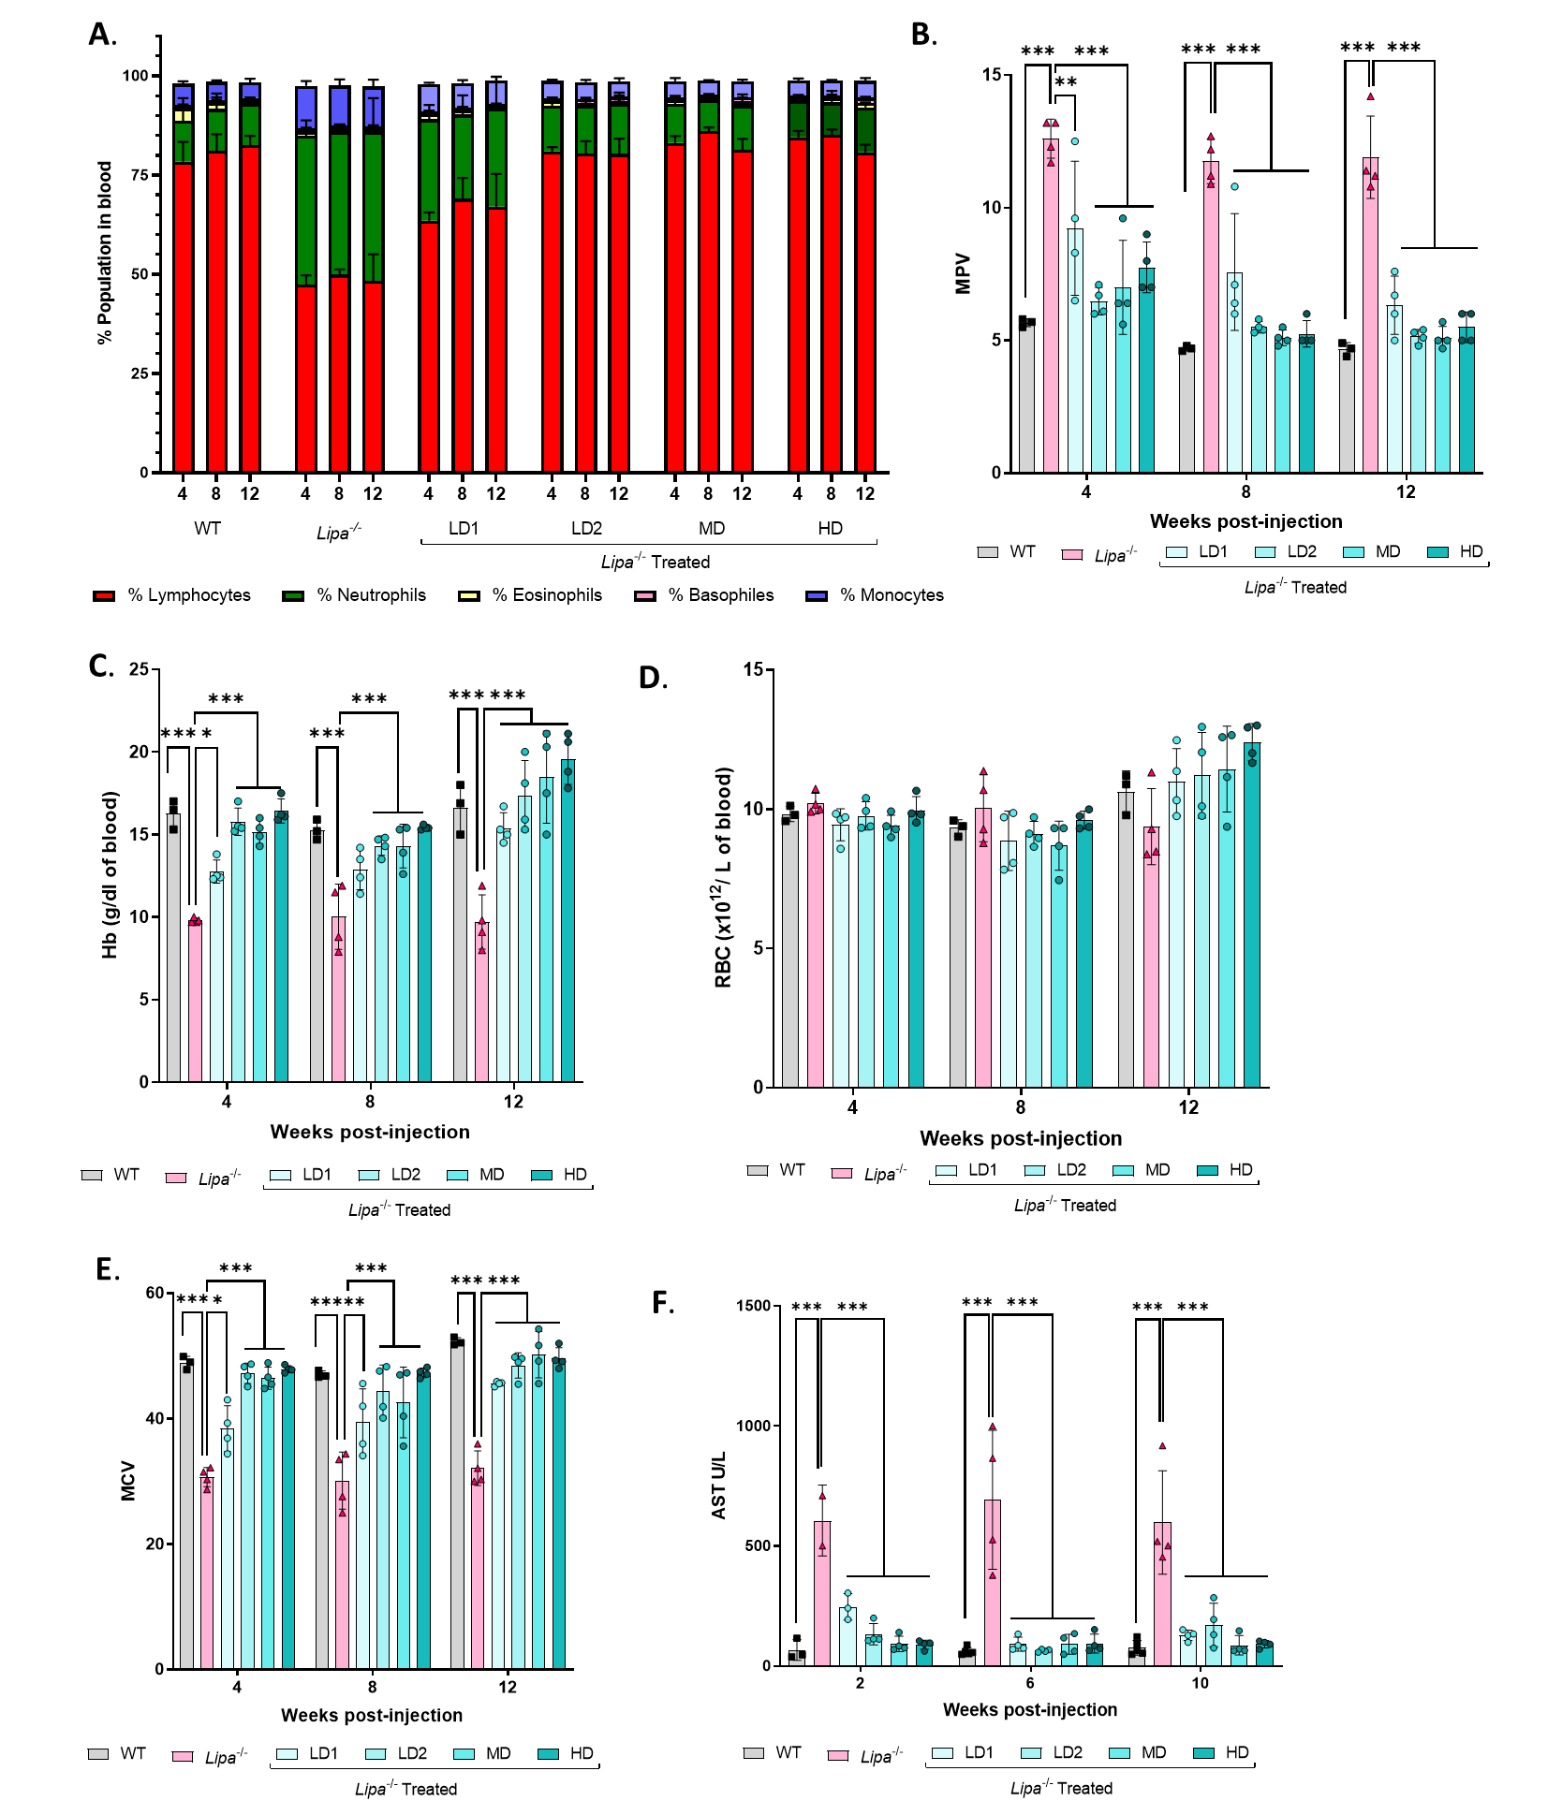


**Fig. S2. Blood analysis of Lipa-/- mice treated with 4 different rAAV8 doses.** **(A** to **B)** Analysis of **(A)** blood cell populations and **(B)** mean platelet volume (MPV) at the indicated time points. (**C-E**) Analysis of red blood cells: **(C)** hemoglobin content, **(D)** count and **(E)** mean corpuscular volume (MCV) at the indicated time points. **(F)** Aspartate aminotransferase (AST) quantification (units per liter; U/L) in plasma samples at the indicate time points. Bars indicate mean ± SD (n=3-4) and statistical significance was calculated using two-way ANOVA with Tukey’s test (*p<0.033; **p<0.002; *** p<0.0001).

**
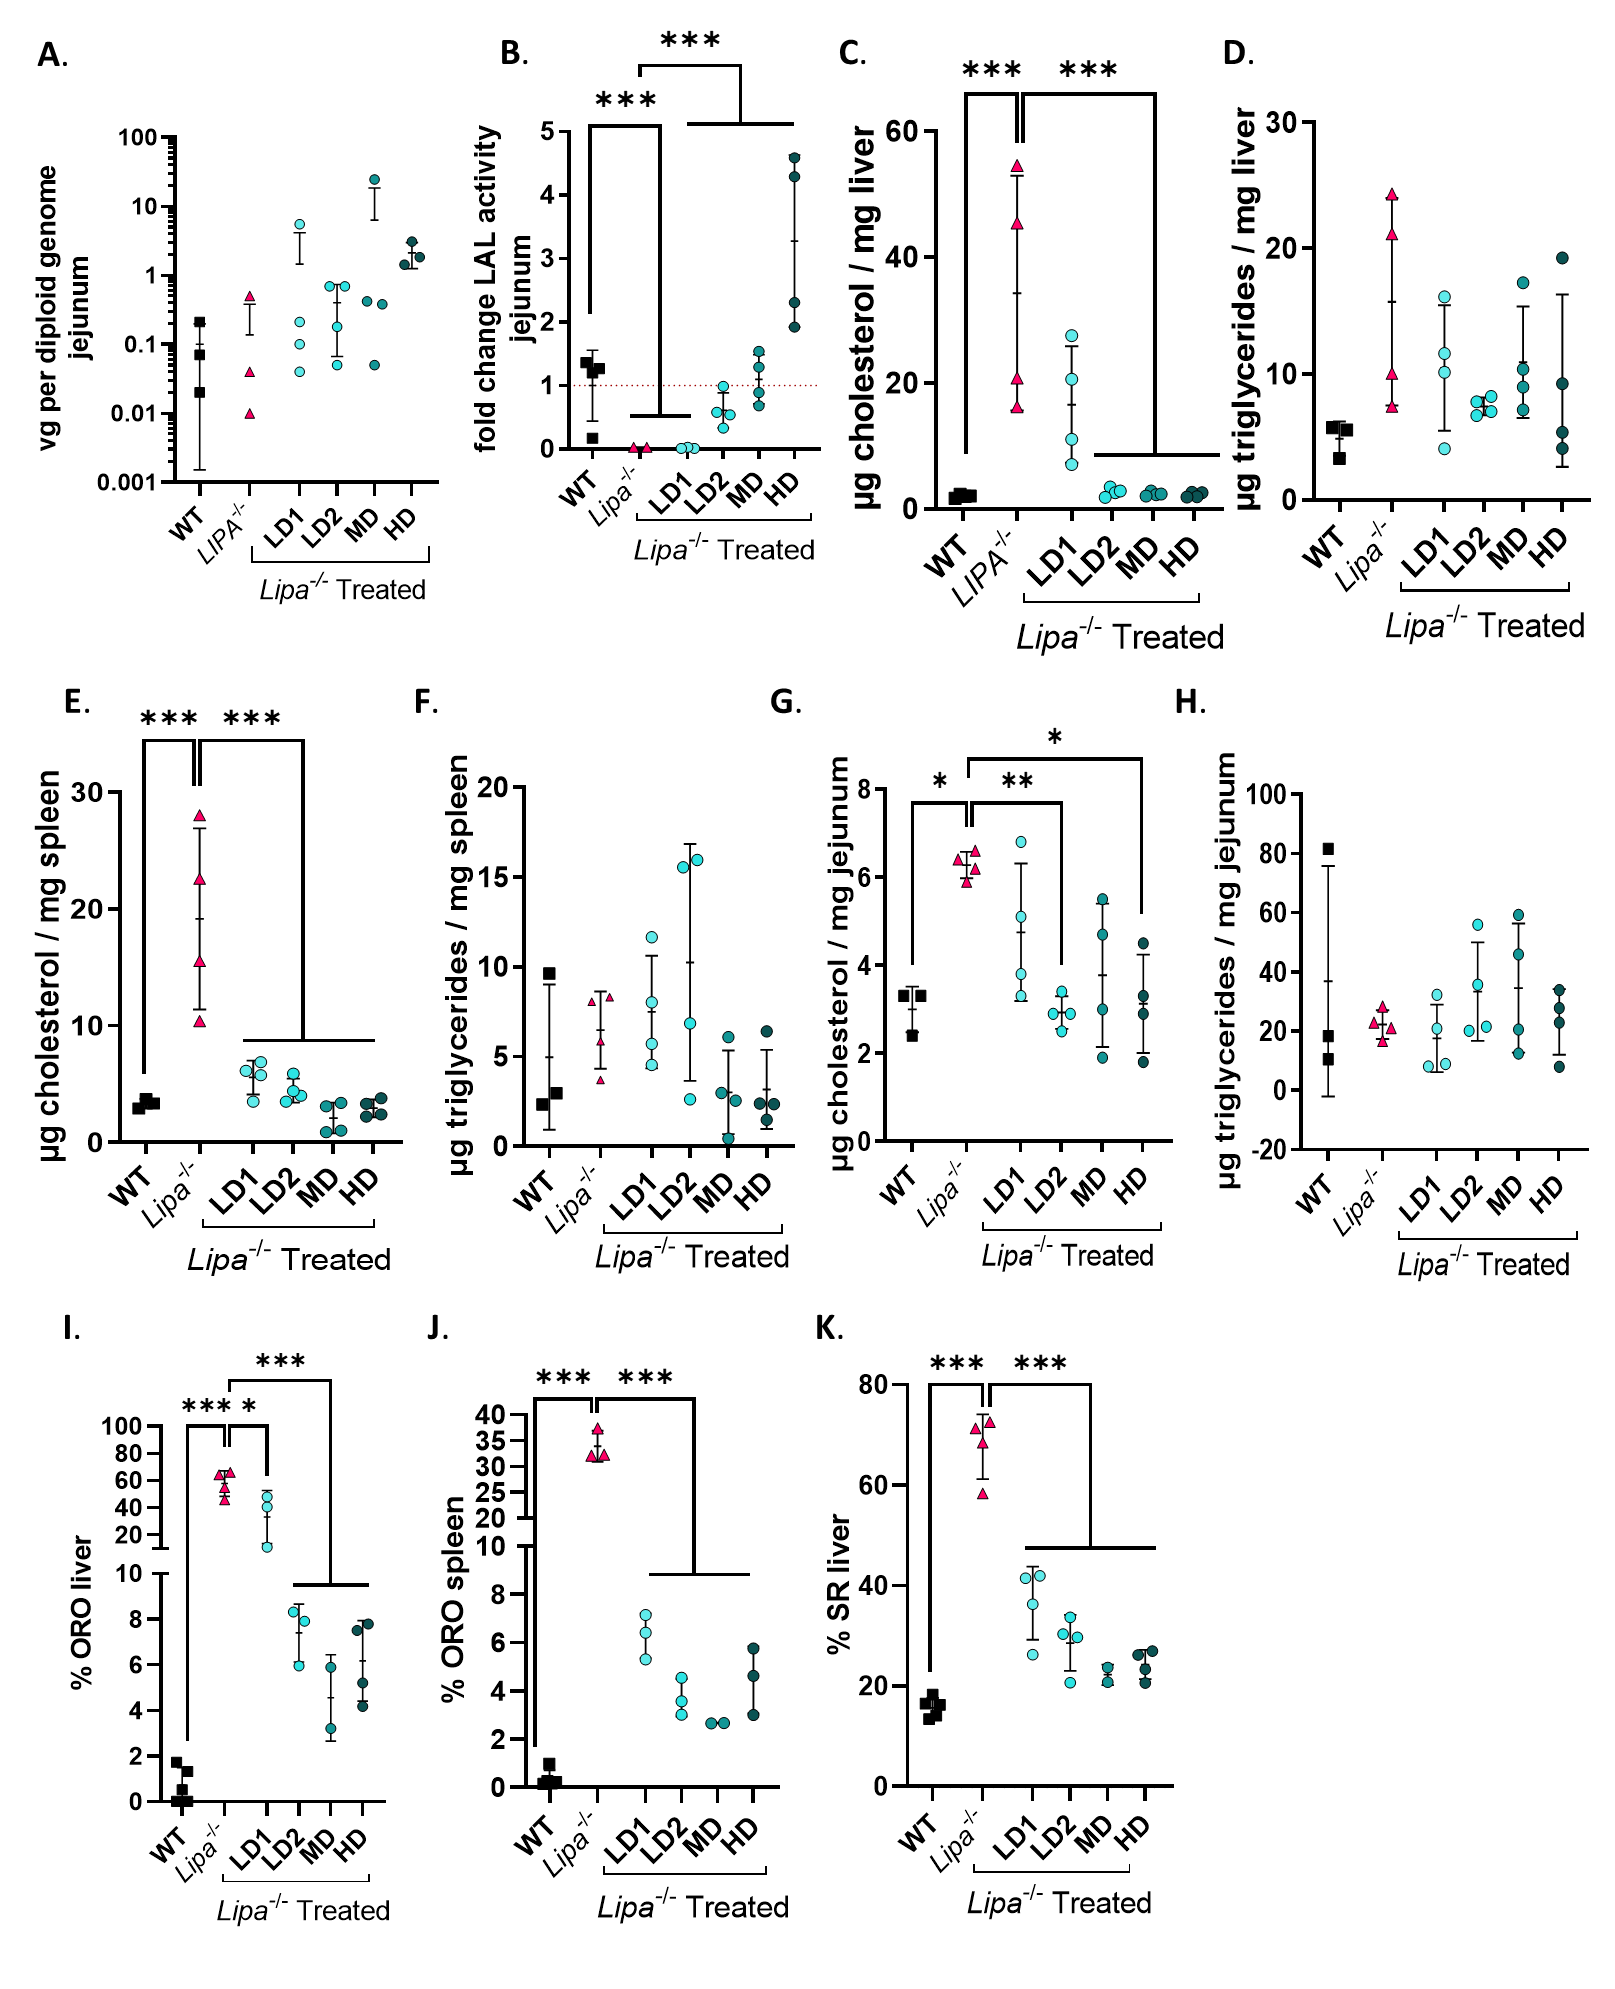
Fig. S3. Quantification of cholesterol and triglycerides in liver, spleen, and jejunum 12-weeks post-injection.** **(A)** Vector copy number of rAAV8 in jejunum (n=3-4). **(B)** Fold change of LAL activity over WT mice in jejunum (n=3-4). Red dotted line indicates WT threshold. **(C** to **D)** Quantification of **(C)** cholesterol and **(D)** triglycerides per mg of liver (n=3-4). **(E** to **F)** Quantification of **(E)** cholesterol and **(F)** triglycerides per mg of spleen (n=3-4). **(G** to **H)** Quantification of **(G)** cholesterol and **(H)** triglycerides per mg of jejunum in function of the doses (n=3-4). **(I** to **J)** % of ORO-stained sections of **(I)** liver and **(J)** spleen (n=2-5). **(K)** % of SR-stained sections of liver (n=2-5). Bars indicate mean ± SD and statistical significance was calculated using two-way ANOVA with Tukey’s test (*p<0.033; **p<0.002; *** p<0.0001).**
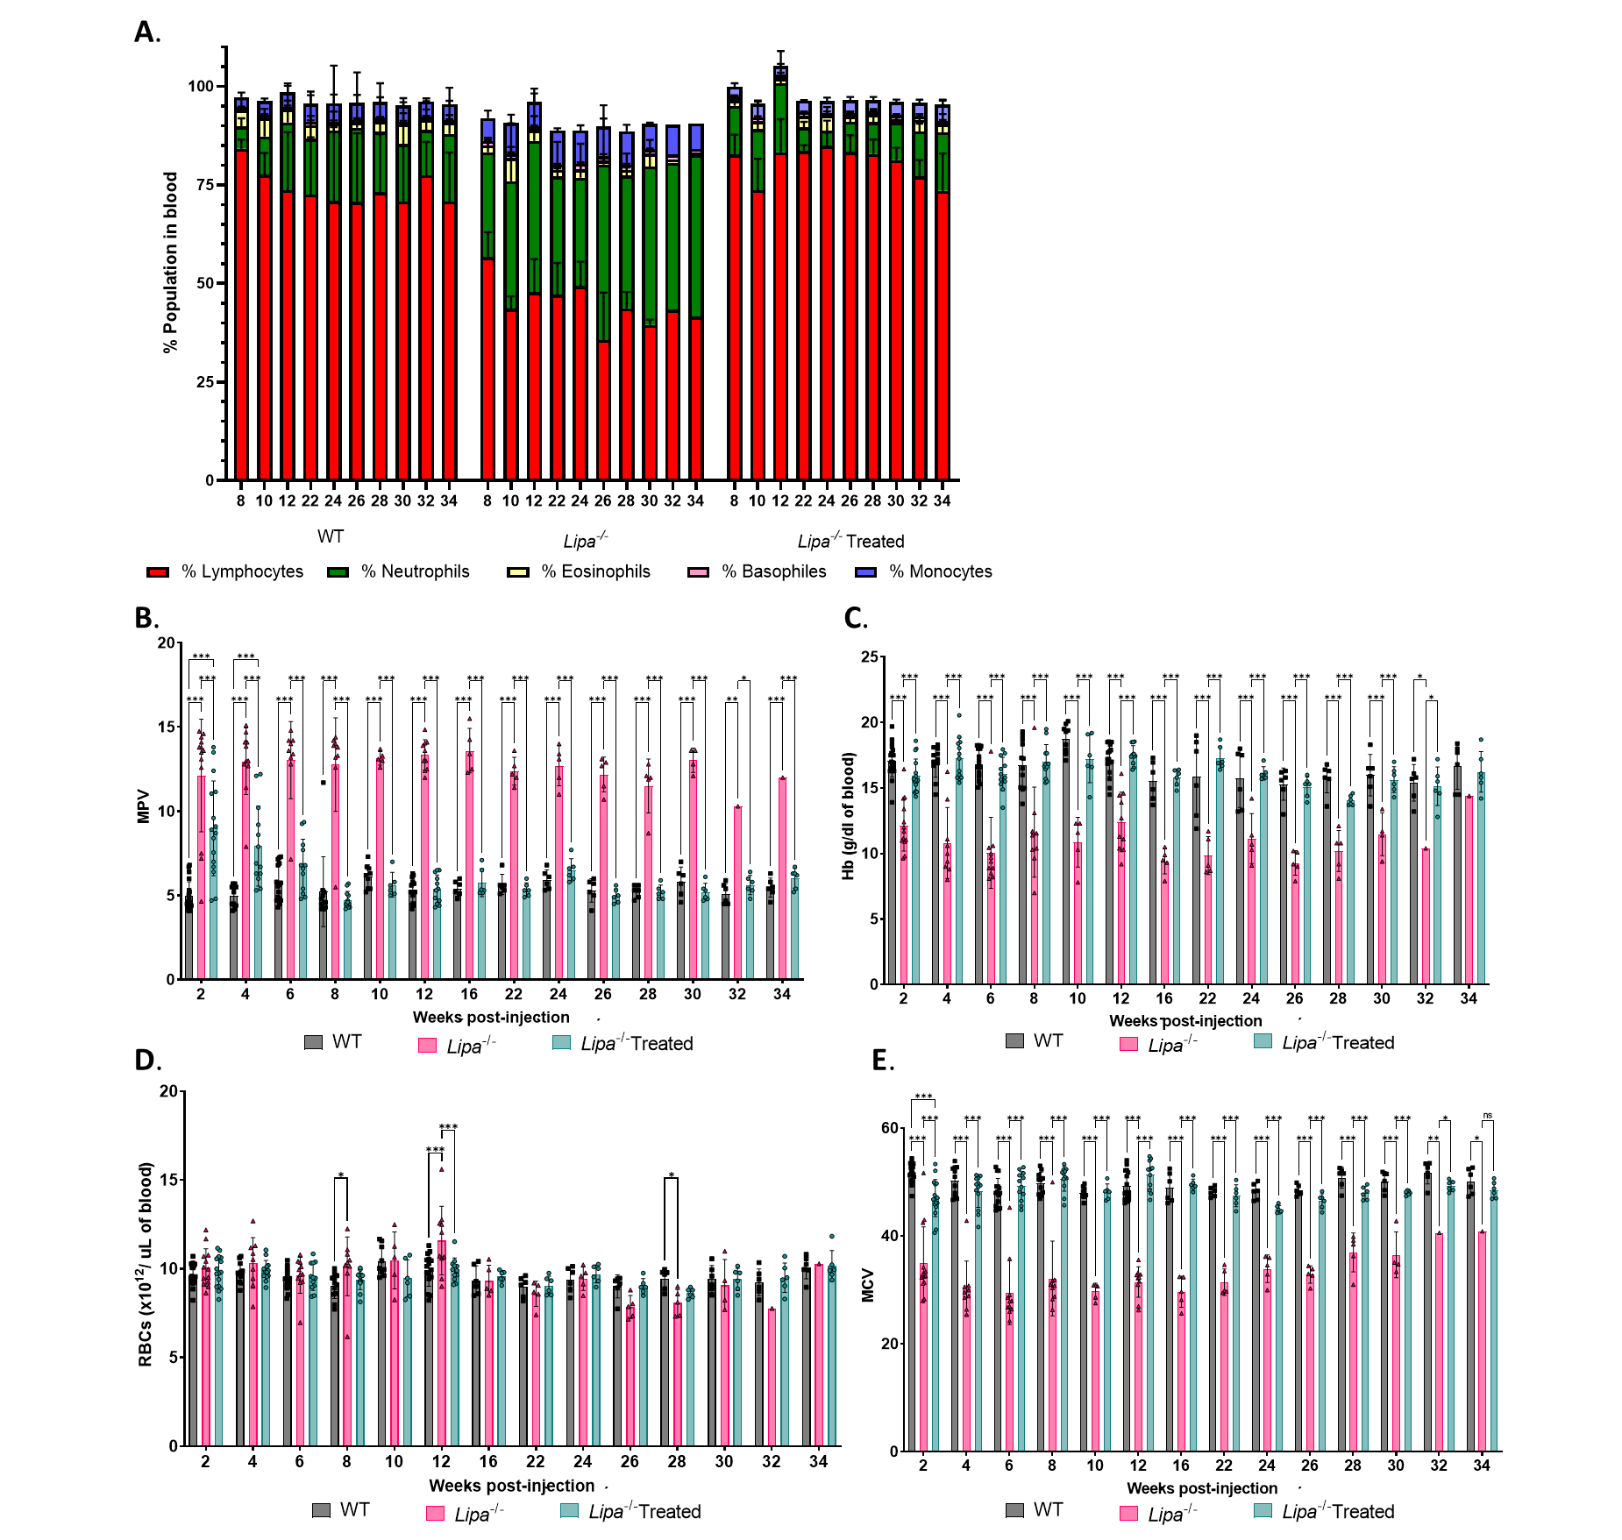
** **Fig. S4. Long-term blood analysis of rAAV8.hAAT.LIPA treated *Lipa-/-* mice. (A)** Blood cells composition measured at the indicated time-points (weeks). **(B)** Analysis of mean platelet volume (MCV) in WT, Lipa-/- and rAAV8-treated Lipa-/- mice measured at the indicated time-points (weeks). **(C** to **E)** Analysis of red blood cells: **(C)** hemoglobin (Hb) content, **(D)** RBC count and **(E)** mean corpuscular volume (MCV), measured at the indicated time-points. Bars indicate mean ± SD (n=1-20) and statistical significance was calculated using two-way ANOVA with Tukey’s test (*p<0.033; **p<0.002; *** p<0.0001).


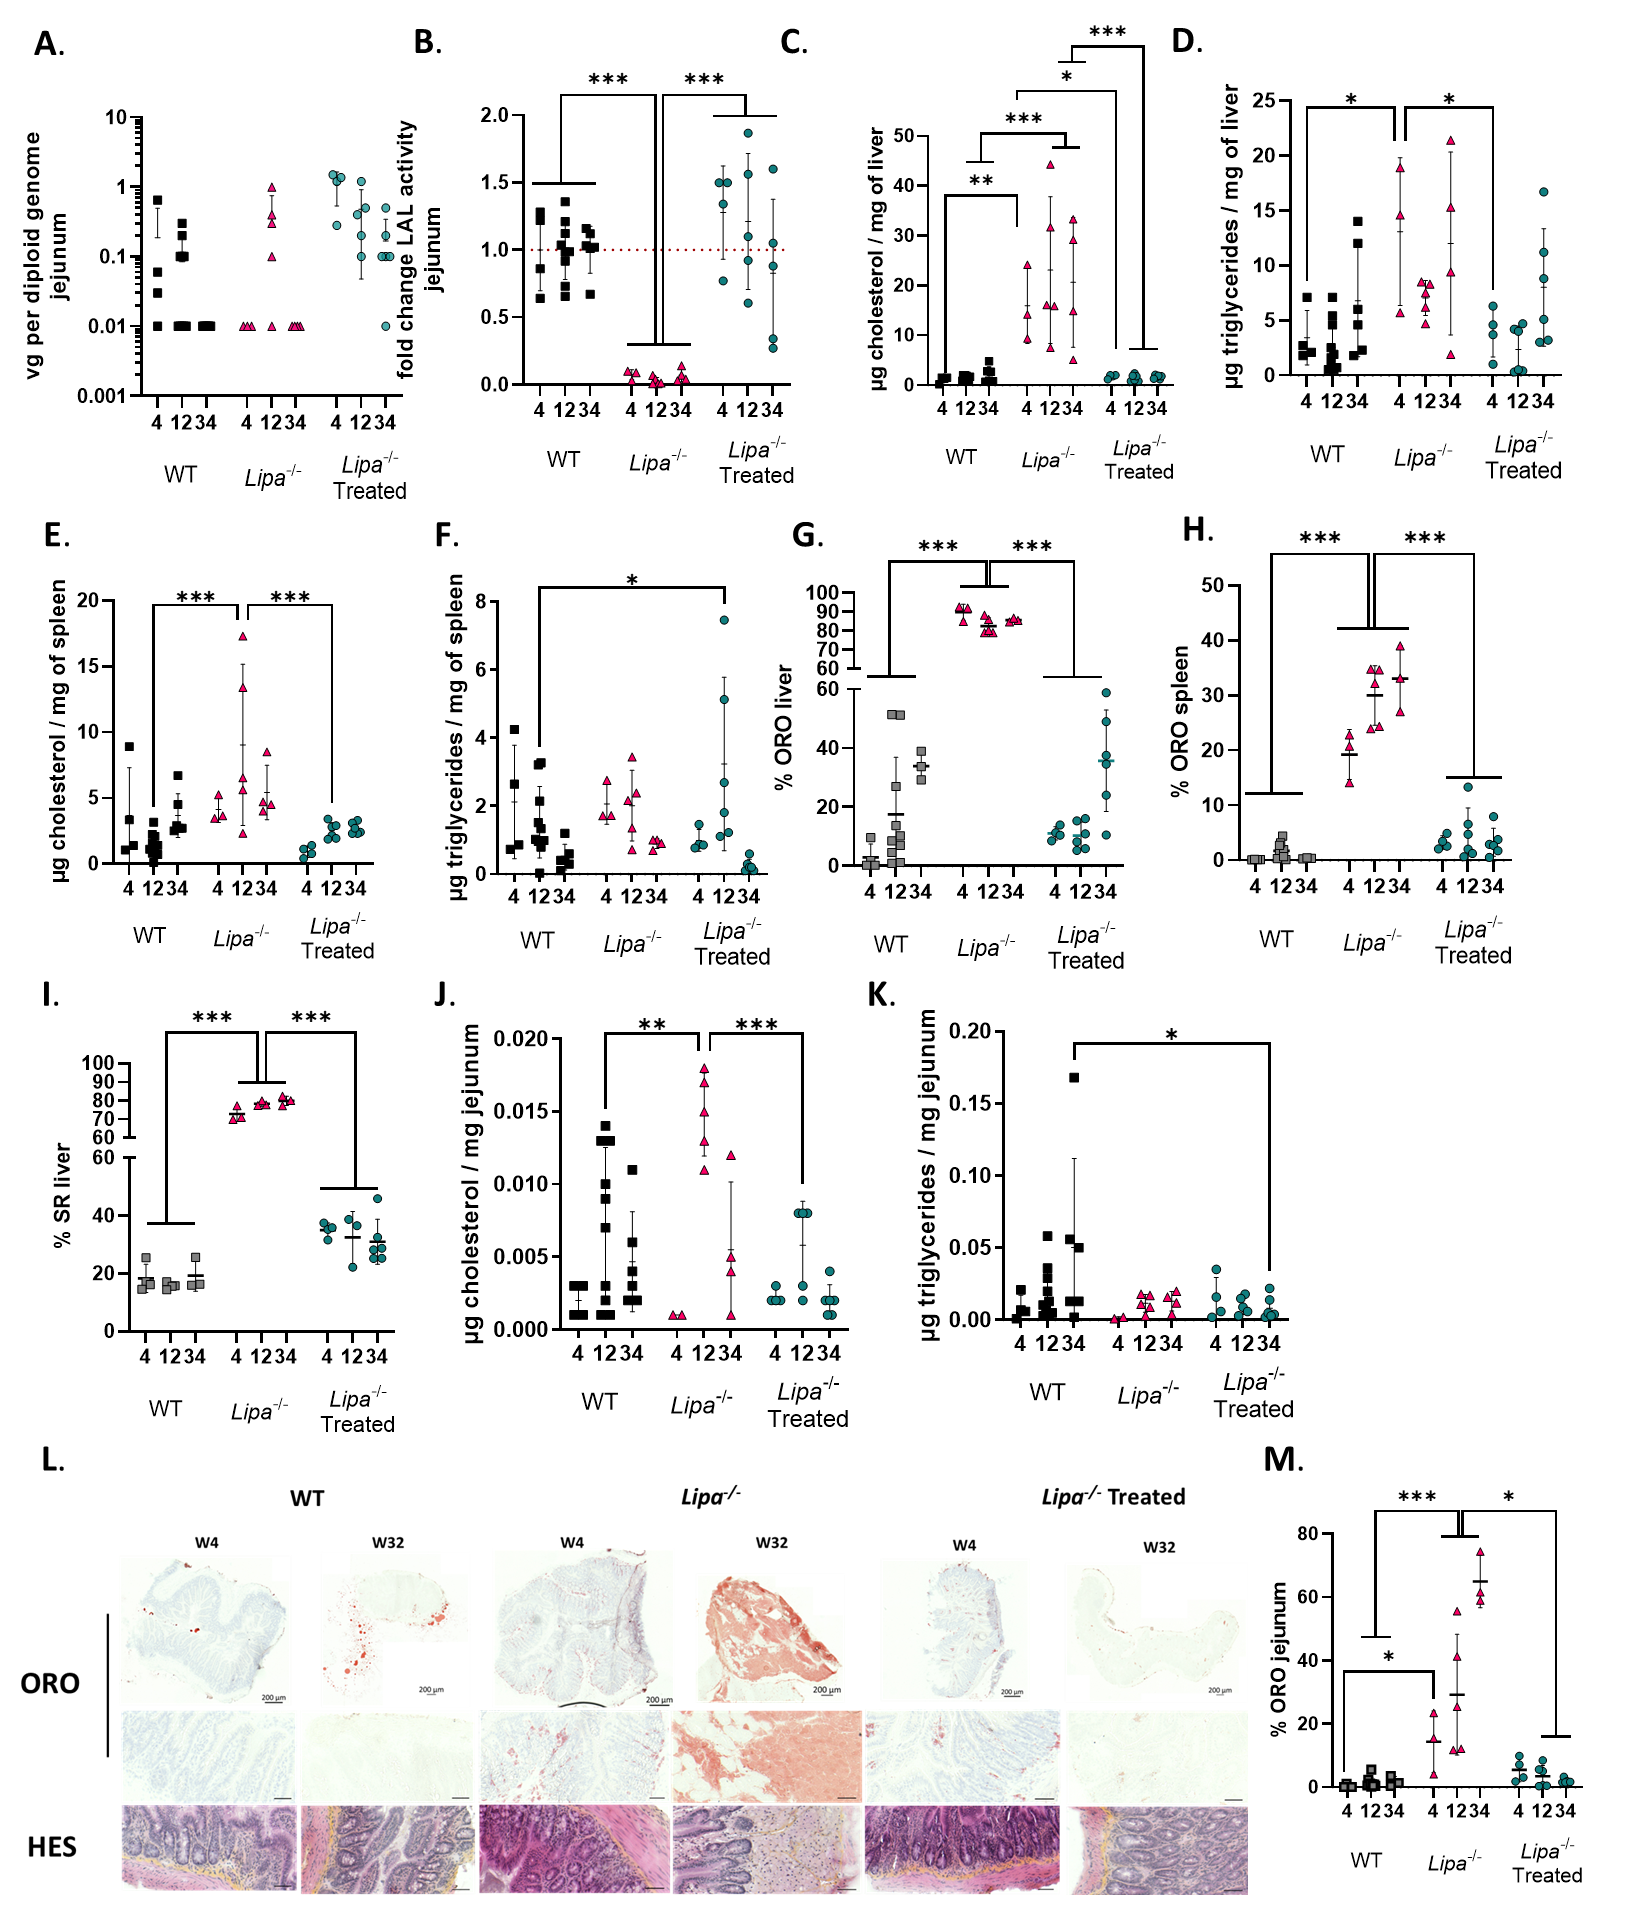
**Fig. S5. Quantification of cholesterol and triglycerides per mg of liver, spleen, and jejunum overtime. (A)** AAV copy number in jejunum at the indicated time-points (weeks) (n=3-6). **(B)** Fold change of LAL activity over WT mice at the indicated time-points (weeks) (n=3-6). Red dotted line indicates WT threshold. **(C** to **D)** Quantification of **(C)** cholesterol and **(D)** triglycerides per mg of liver at the indicated time-points (weeks) (n=3-6). **(E** to **F)** Quantification of **(E)** cholesterol and **(F)** triglycerides per mg of spleen liver at the indicated time-points (weeks) (n=3-6). **(G** to **H)** % of ORO-stained sections of **(G)** liver and **(H)** spleen (n=3-10). **(I)** % of SR-stained sections ofliver (n=2-5). **(J** to **K)** Quantification of **(J)** cholesterol and **(K)** triglycerides per mg of jejunum at the indicated time-points (weeks) (n=3-6). **(L)** Histological sections of jejunum at 4 and 34-weeks post-injection stained with ORO and HES (scale bar: 50µm). (**M)** % of ORO-stained tissues in jejunum (n=3-10). Bars indicate mean ± SD and statistical significance was calculated using two-way ANOVA with Tukey’s test (*p<0.033; **p<0.002; *** p<0.0001).

**
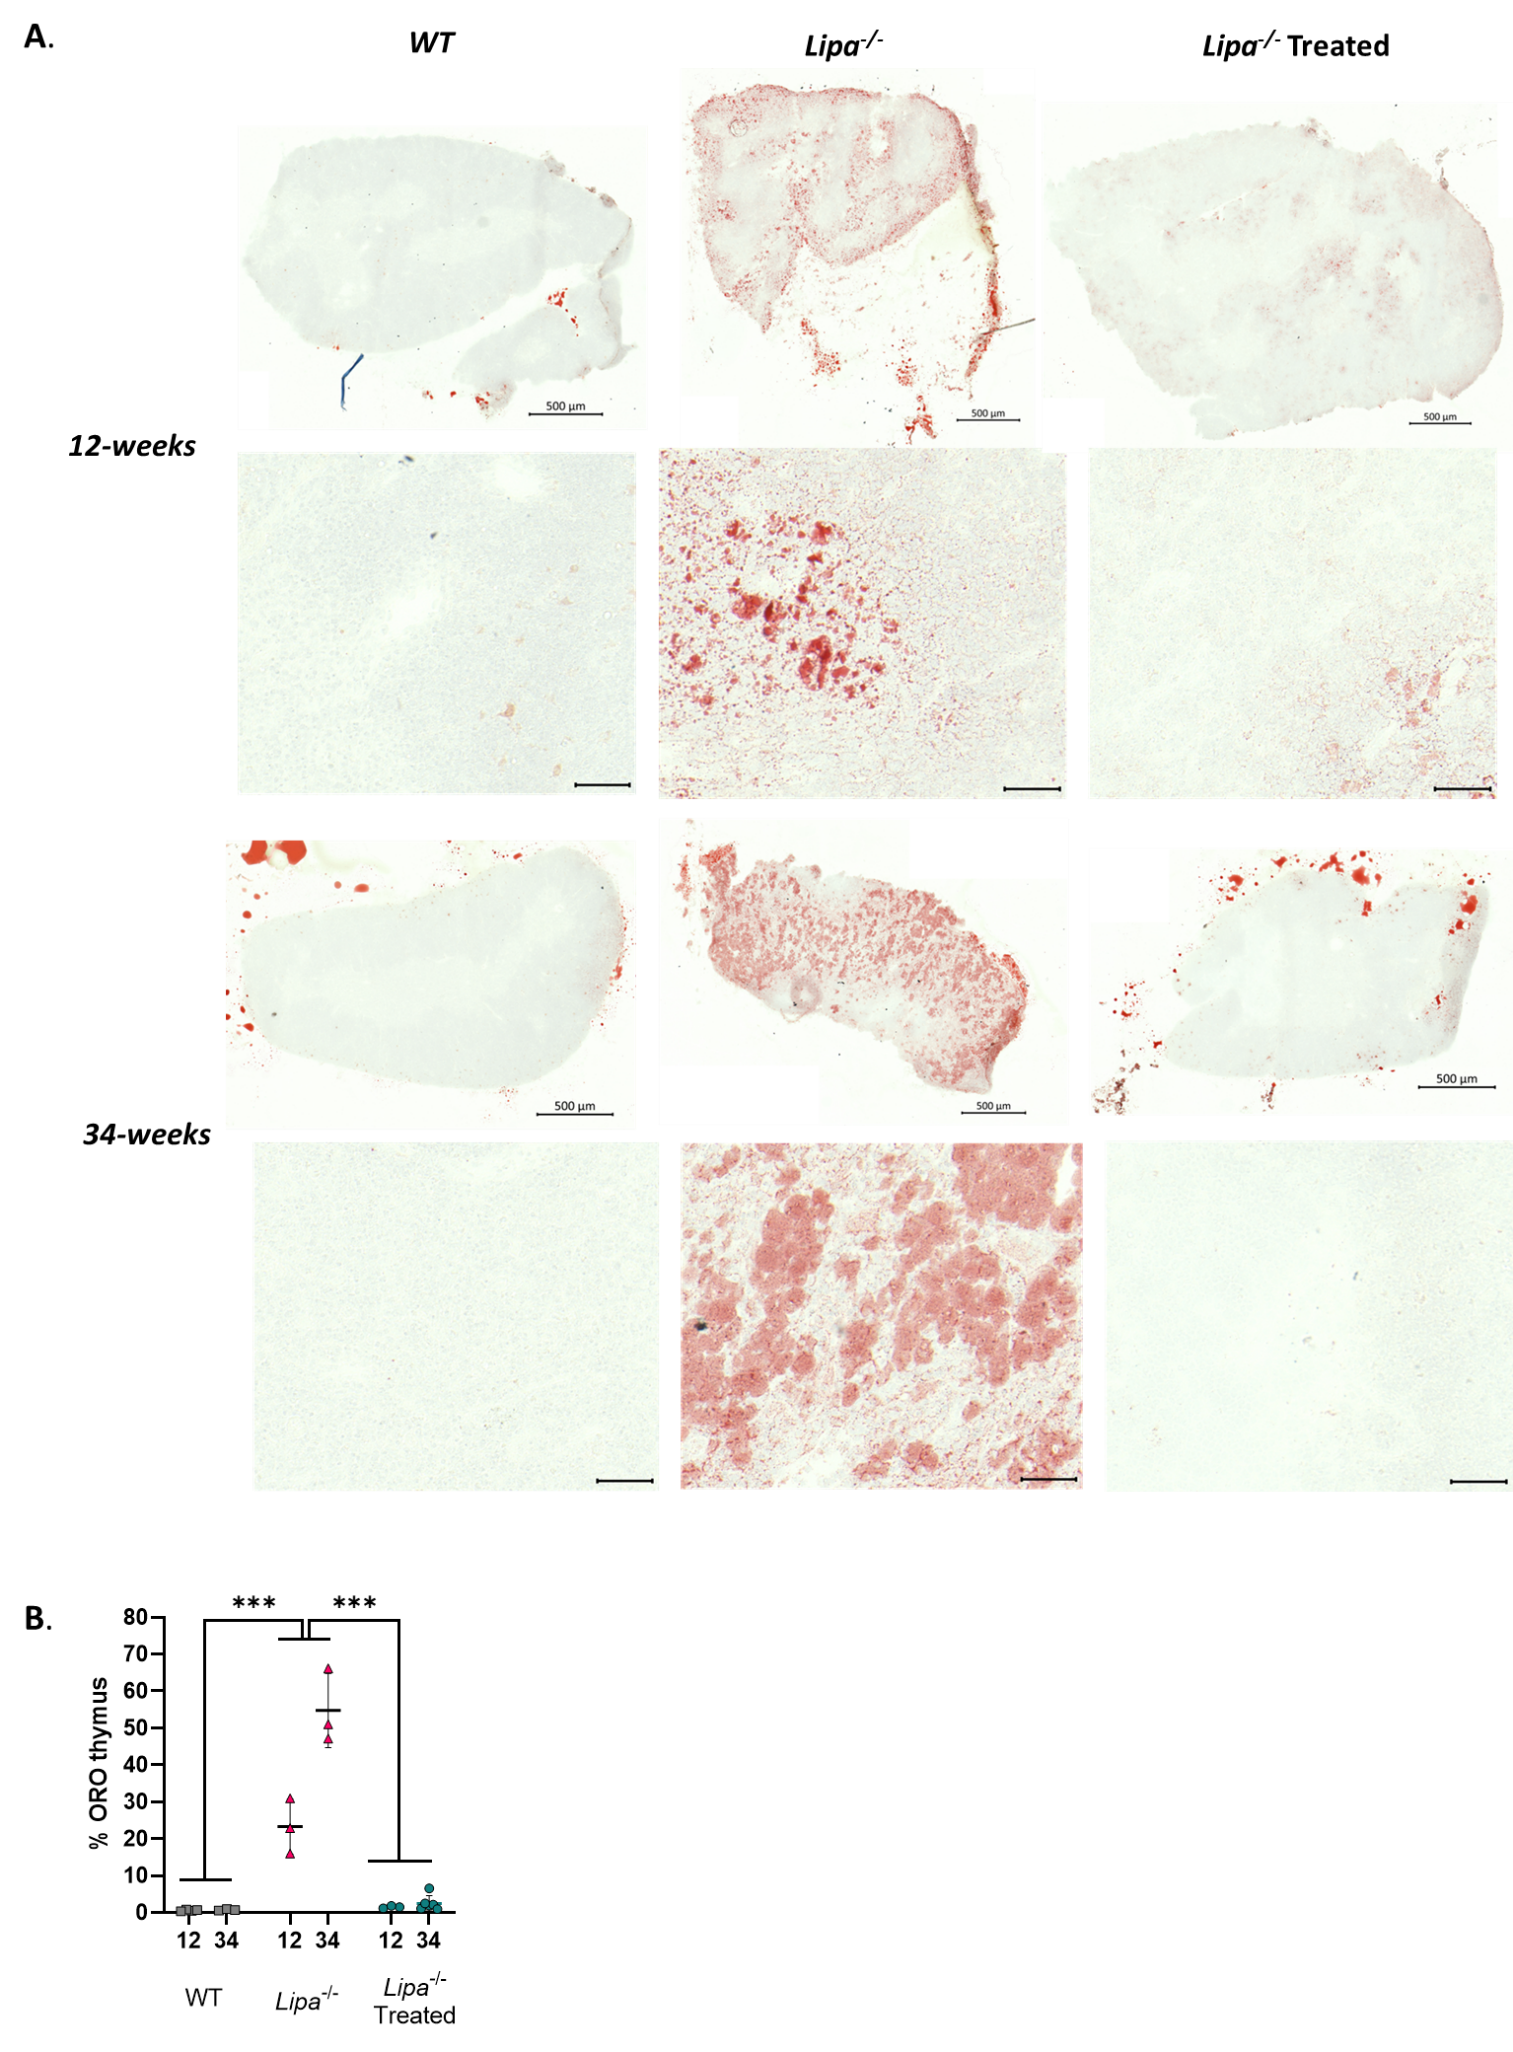
**

**Fig. S6. Lipid deposits in thymus.** **(A)** Histological section of thymus stained with ORO at 12- and 34-weeks post-injection (scale bar: 50µm). **(B)** % of ORO-stained sections in the thymus.Bars indicate mean ± SD (n=3-10) and statistical significance was calculated using two-way ANOVA with Tukey’s test (*p<0.033; **p<0.002; *** p<0.0001).


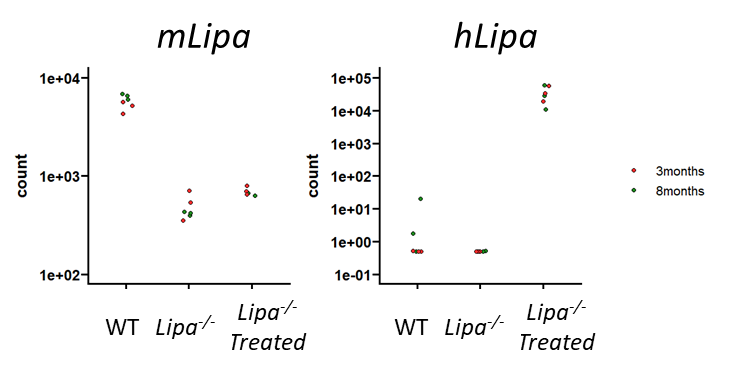


**Fig. S7. Read count of murine (m) and human (h) LIPA mRNA at 34-weeks post-injection.**
